# Supplementary material for: KRAS and EGFR Mutations Differentially Alter ABC Drug Transporter Expression in Cisplatin-Resistant Non-Small Cell Lung Cancer
Source: MDPI journal article supplement (doi:10.3390/ijms22105384), 2021-05-20
Supplement: s1 [file s1]

## Supplementary Data

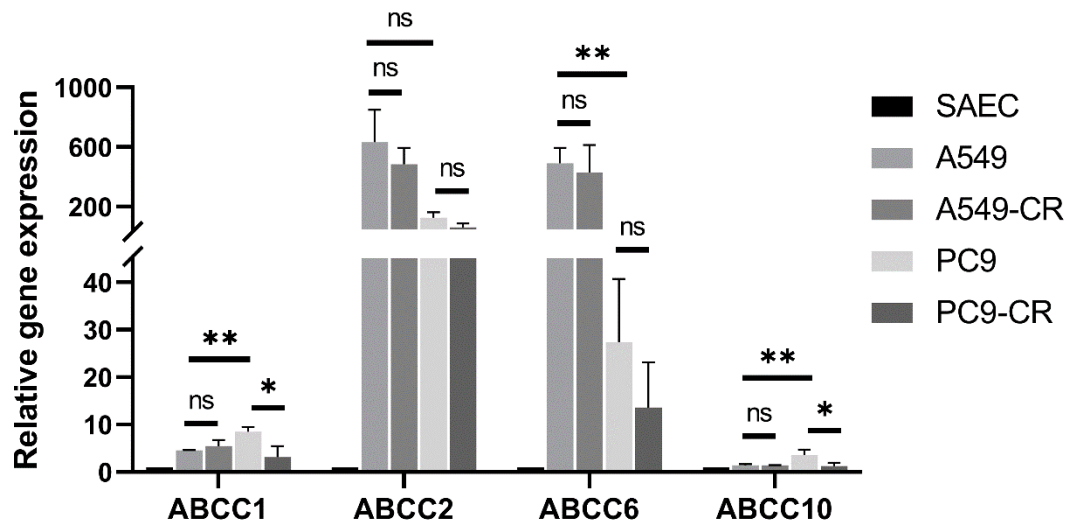

**Supplementary Figure 1. Gene expression pattern of ABCC1, ABCC2, ABCC6, ABCC10 in 2D cell cultures**

Relative mRNA expression ( $2^{-ddCt}$ ) of ABCC1, ABCC2, ABCC6 and ABCC10 drug transporters in solvent control parental and cisplatin-resistant adenocarcinoma cell lines (A549, A549-CR, PC9, PC9-CR) compared to normal, primary human SAEC. The graph shows the mean and SD of biological repeats (n=3).

**A**

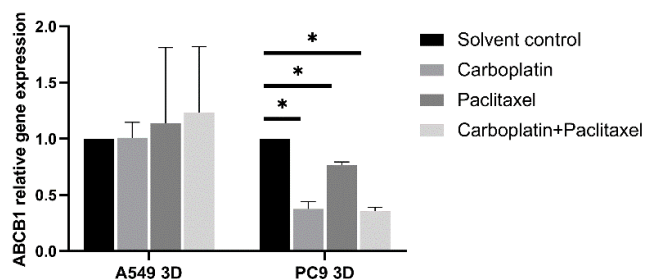

**B**

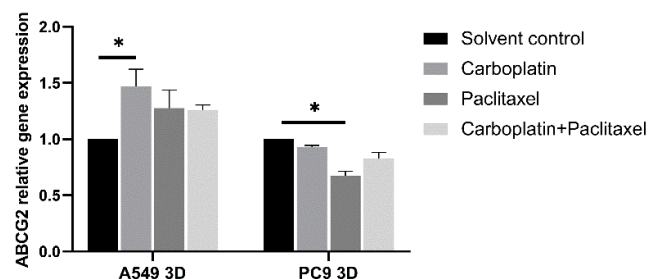

**Supplementary Figure 2. Effect of clinically relevant chemotherapeutic drugs on parental cell line containing 3D aggregates. (a)** Relative mRNA expression ( $2^{-ddCt}$ ) of ABCB1 drug transporters in solvent control parental AC cell line (A549, PC9) containing 3D aggregate co-cultures. The inner control was beta actin. **(b)** Relative mRNA expression of ABCG2 drug transporters in solvent control parental AC cell line (A549-CR, PC9-CR) containing 3D aggregate co-cultures. The inner control was beta actin.

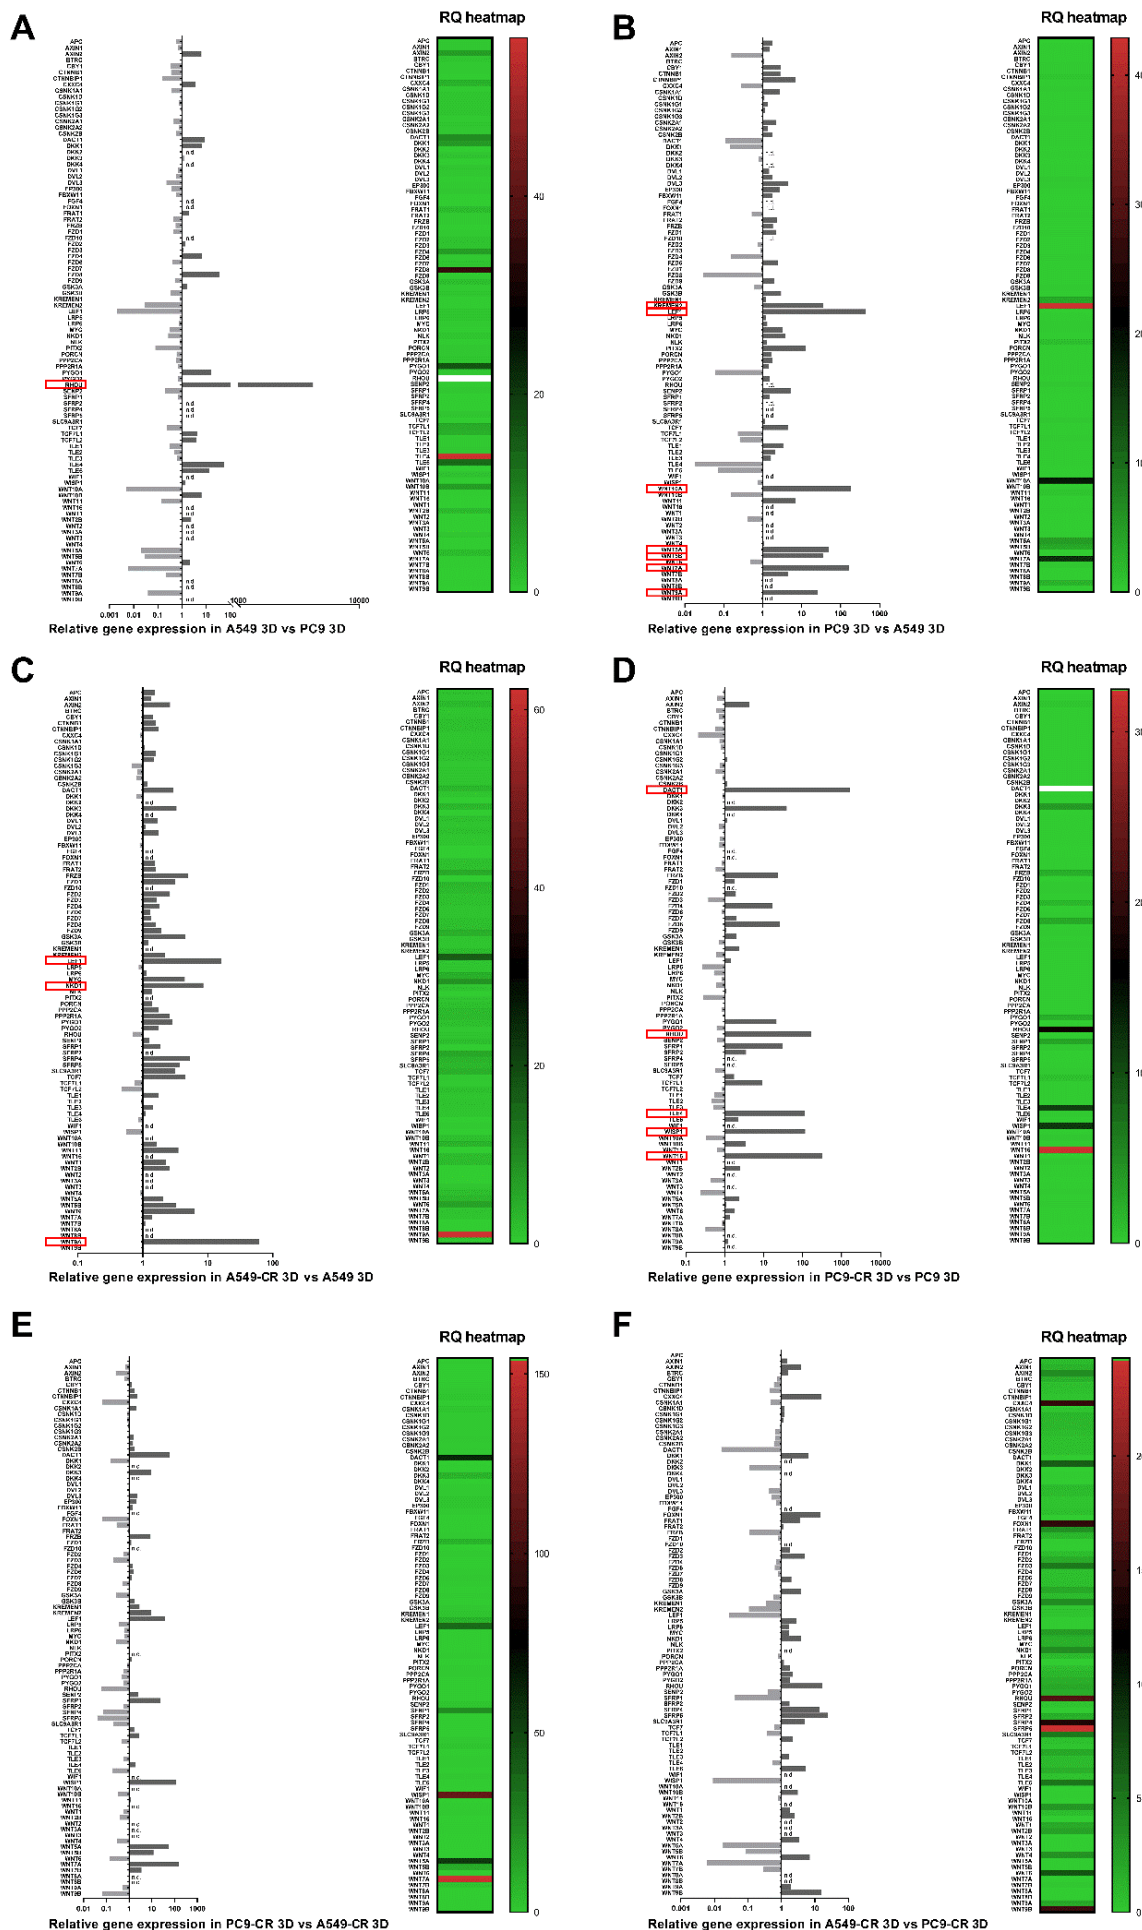

**Supplementary Figure 3. Changes in Wnt signalling pathway activation.** (a) Relative mRNA expression ( $2^{-ddCt}$ ) of Wnt signalling pathway genes in A549 3D aggregates relative to PC9 3D aggregates. (b) Relative mRNA expression ( $2^{-ddCt}$ ) of Wnt signalling pathway genes in PC9 3D aggregates relative to A549 3D aggregates. (c) Relative mRNA expression ( $2^{-ddCt}$ ) of Wnt signalling pathway genes in A549-CR 3D aggregates relative to A549 3D aggregates. (d) Relative mRNA expression ( $2^{-ddCt}$ ) of Wnt signalling pathway genes in PC9-CR 3D aggregates relative to PC9 3D aggregates. (e) Relative mRNA expression ( $2^{-ddCt}$ ) of Wnt signalling pathway genes in PC9-CR 3D aggregates relative to A549-CR 3D aggregates. (f) Relative mRNA expression ( $2^{-ddCt}$ ) of Wnt signalling pathway genes in A549-CR 3D aggregates relative to PC9-CR 3D aggregates.

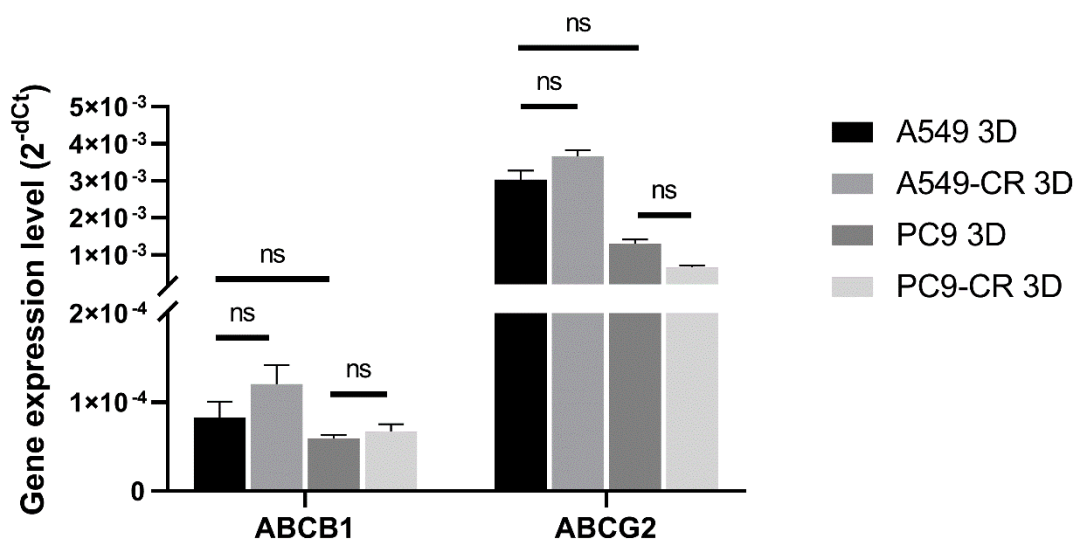

**Supplementary Figure 4. Relative mRNA expression ( $2^{-ddCt}$ ) of drug transporters in 3D aggregates.** Relative mRNA expression ( $2^{-ddCt}$ ) of ABCB1 and ABCG2 drug transporters in parental (A549, PC9) and cisplatin-resistant AC cell line (A549-CR, PC9-CR) containing 3D aggregate co-cultures. The inner control was beta-actin. Biological repeats n=3.
